# Supplementary material for: Valorization of an Old Variety of Triticum aestivum: A Study of Its Suitability for Breadmaking Focusing on Sensory and Nutritional Quality
Source: MDPI journal article supplement (doi:10.3390/foods12061351), 2023-03-22
Supplement: s1 [file s1]

**Table S1.** Chemical and technological parameters of M2 flour. Results are expressed as mean  $\pm$  SD (n = 4)

| Parameters           | Units                   | M2                |
|----------------------|-------------------------|-------------------|
| <i>Chemical</i>      |                         |                   |
| Humidity             | % w/w                   | 11.63 $\pm$ 0.22  |
| Ashes                | % w/w                   | 1.65 $\pm$ 0.12   |
| Proteins             | % w/w                   | 12.22 $\pm$ 0.26  |
| Total fats           | % w/w                   | 2.13 $\pm$ 0.43   |
| Total dietary fiber  | % w/w                   | 4.72 $\pm$ 0.32   |
| Maltose              | % w/w                   | 5.28 $\pm$ 0.27   |
| Glucose              | % w/w                   | 0.33 $\pm$ 0.04   |
| Fructose             | % w/w                   | 0.16 $\pm$ 0.03   |
| Sucrose              | % w/w                   | 0.76 $\pm$ 0.07   |
| Wet gluten           | % w/w                   | 33.92 $\pm$ 2.12  |
| Dry gluten           | % w/w                   | 11.12 $\pm$ 1.42  |
| Gluten index         | % w/w                   | 56.73 $\pm$ 13.01 |
| Total Starch         | % w/w                   | 78.13 $\pm$ 0.82  |
| Falling number       | Seconds                 | 343 $\pm$ 15      |
| Total polyphenol     | mg GAE /kg dm           | 600 $\pm$ 27      |
| Total flavonoids     | mg CE /g dm             | 50.7 $\pm$ 1.2    |
| ABTS                 | $\mu$ mol TE /g dm      | 0.97 $\pm$ 0.07   |
| DPPH                 | $\mu$ mol TE /g dm      | 0.55 $\pm$ 0.05   |
| FRAP                 | $\mu$ mol TE /g dm      | 1.09 $\pm$ 0.06   |
| <i>Technological</i> |                         |                   |
| W                    | 10 <sup>-4</sup> joules | 165 $\pm$ 17      |
| P                    | mm                      | 85 $\pm$ 14       |
| L                    | mm                      | 60 $\pm$ 10       |
| P/L                  |                         | 1.41 $\pm$ 0.72   |
| G                    |                         | 19.6 $\pm$ 1.6    |

**Table S2.** Complete headspace compositions of baked bread as a function of flour and leavening agent

| VOCs compounds         | SB-C               | SB-M2              | YB-C               | YB-M2              |
|------------------------|--------------------|--------------------|--------------------|--------------------|
| 2,3-epoxybutane        | 3.70 <sup>a</sup>  | 0.10 <sup>b</sup>  | n.d.               | n.d.               |
| acetic acid            | 19.30 <sup>b</sup> | 22.75 <sup>a</sup> | n.d.               | n.d.               |
| ethyl acetate          | 2.70 <sup>a</sup>  | n.d.               | 0.81 <sup>c</sup>  | 0.95 <sup>b</sup>  |
| 2-methyl, 1-propanol   | n.d.               | n.d.               | 0.21 <sup>b</sup>  | 0.90 <sup>a</sup>  |
| isobutyl alcohol       | n.d.               | n.d.               | 1.50 <sup>b</sup>  | 1.75 <sup>a</sup>  |
| 3-methyl-butanal       | 5.10 <sup>b</sup>  | 6.35 <sup>a</sup>  | 0.35 <sup>c</sup>  | 0.12 <sup>d</sup>  |
| 2-methyl-butanal       | 4.55 <sup>a</sup>  | 1.61 <sup>b</sup>  | 0.40 <sup>c</sup>  | 0.22 <sup>d</sup>  |
| pentanal               | 0.30 <sup>b</sup>  | 1.45 <sup>a</sup>  | 0.25 <sup>b</sup>  | n.d.               |
| heptane                | n.d.               | n.d.               | n.d.               | 0.21 <sup>a</sup>  |
| 2-ethyl-furan          | 1.90 <sup>a</sup>  | 1.15 <sup>b</sup>  | 0.30 <sup>c</sup>  | n.d.               |
| acetoin                | n.d.               | n.d.               | 0.25 <sup>b</sup>  | 0.45 <sup>a</sup>  |
| 3-methyl-1-butanol     | 1.20 <sup>c</sup>  | 0.40 <sup>d</sup>  | 17.30 <sup>b</sup> | 22.45 <sup>a</sup> |
| isopentyl alcohol      | n.d.               | 1.40 <sup>a</sup>  | n.d.               | 0.30 <sup>b</sup>  |
| 2-methyl-1-butanol     | n.d.               | n.d.               | 6.35 <sup>b</sup>  | 8.05 <sup>a</sup>  |
| 1-pentanol             | 0.95 <sup>a</sup>  | 0.60 <sup>b</sup>  | 0.40 <sup>c</sup>  | 0.30 <sup>d</sup>  |
| 1,3,5-cycloheptatriene | 0.92 <sup>a</sup>  | n.d.               | n.d.               | n.d.               |
| 2,3-butanediol         | 0.10 <sup>b</sup>  | n.d.               | 0.45 <sup>a</sup>  | 0.40 <sup>a</sup>  |
| hexanal                | 14.40 <sup>c</sup> | 13.80 <sup>d</sup> | 20.90 <sup>a</sup> | 18.45 <sup>b</sup> |
| methyl-pyrazine        | n.d.               | 0.85 <sup>a</sup>  | n.d.               | 0.25 <sup>b</sup>  |
| furfural               | 3.65 <sup>b</sup>  | 5.05 <sup>a</sup>  | n.d.               | 0.30 <sup>c</sup>  |
| 4-methyl-pyrimidine    | n.d.               | 0.85 <sup>a</sup>  | n.d.               | n.d.               |
| 5-methyl-2-heptanol    | n.d.               | n.d.               | 0.25 <sup>a</sup>  | 0.10 <sup>b</sup>  |
| 2-furanmethanol        | n.d.               | n.d.               | 0.95 <sup>b</sup>  | 1.25 <sup>a</sup>  |
| p-xylene               | n.d.               | n.d.               | 1.45 <sup>a</sup>  | 0.70 <sup>b</sup>  |
| m-xylene               | n.d.               | n.d.               | 0.65 <sup>b</sup>  | 1.00 <sup>a</sup>  |
| 1-hexanol              | 2.05 <sup>d</sup>  | 3.50 <sup>c</sup>  | 4.95 <sup>a</sup>  | 4.40 <sup>b</sup>  |
| 2-heptanone            | n.d.               | n.d.               | 0.45 <sup>b</sup>  | 1.30 <sup>a</sup>  |
| 4-heptanone            | 1.20 <sup>a</sup>  | 0.65 <sup>c</sup>  | 1.10 <sup>b</sup>  | 0.70 <sup>c</sup>  |
| 2n-butylfuran          | 0.65 <sup>a</sup>  | 0.50 <sup>b</sup>  | n.d.               | n.d.               |
| heptanal               | 2.95 <sup>a</sup>  | 2.40 <sup>c</sup>  | 1.90 <sup>d</sup>  | 2.75 <sup>b</sup>  |
| 2-methoxy pyrazine     | 1.30 <sup>b</sup>  | 1.35 <sup>b</sup>  | 1.85 <sup>a</sup>  | 1.10 <sup>c</sup>  |
| 2,5-dimethyl-pyrazine  | 1.05 <sup>a</sup>  | 0.20 <sup>b</sup>  | 0.10 <sup>c</sup>  | 0.05 <sup>c</sup>  |
| ethyl-pyrazine         | n.d.               | 0.75 <sup>a</sup>  | n.d.               | 0.45 <sup>b</sup>  |
| 2,3-dimethyl-pyrazine  | n.d.               | n.d.               | 0.15 <sup>b</sup>  | 0.20 <sup>b</sup>  |
| 2,6-dimethyl pyrazine  | 0.05 <sup>b</sup>  | 0.35 <sup>a</sup>  | 0.10 <sup>b</sup>  | 0.40 <sup>a</sup>  |
| $\alpha$ -pinene       | 0.60 <sup>a</sup>  | 0.40 <sup>c</sup>  | 0.50 <sup>b</sup>  | 0.15 <sup>d</sup>  |
| (E)-2-heptenal         | 0.15 <sup>b</sup>  | 0.40 <sup>a</sup>  | n.d.               | n.d.               |
| (Z)-2-heptanal         | n.d.               | 0.75 <sup>a</sup>  | 0.10 <sup>b</sup>  | 0.05 <sup>b</sup>  |
| benzaldehyde           | 0.30 <sup>d</sup>  | 1.95 <sup>a</sup>  | 0.40 <sup>c</sup>  | 0.55 <sup>b</sup>  |
| 5-methylfurfural       | 0.30 <sup>a</sup>  | n.d.               | n.d.               | 0.05 <sup>b</sup>  |
| 1-octen-1-ol           | 0.20 <sup>c</sup>  | n.d.               | 0.45 <sup>a</sup>  | 0.35 <sup>b</sup>  |
| hexadecanoic acid      | n.d.               | 0.30 <sup>a</sup>  | n.d.               | n.d.               |
| 2-pentyl furan         | 20.50 <sup>b</sup> | 15.45 <sup>d</sup> | 24.30 <sup>a</sup> | 18.25 <sup>c</sup> |

|                                                |                   |                   |                   |                   |
|------------------------------------------------|-------------------|-------------------|-------------------|-------------------|
| δ-3-carene                                     | 0.50 <sup>b</sup> | 0.75 <sup>a</sup> | n.d.              | n.d.              |
| p-cymene                                       | 0.35 <sup>b</sup> | 0.90 <sup>a</sup> | n.d.              | n.d.              |
| limonene                                       | 1.10 <sup>a</sup> | 1.15 <sup>a</sup> | 0.85 <sup>b</sup> | 0.90 <sup>b</sup> |
| 3-ethyl-2-methyl-1,3-hexadiene                 | n.d.              | n.d.              | 1.45 <sup>a</sup> | 0.95 <sup>b</sup> |
| 1-acetyl-1,4-dihydropyridine                   | n.d.              | n.d.              | 0.05 <sup>b</sup> | 0.15 <sup>a</sup> |
| 5-ethylcyclopentene-1-carbaldehyde             | 1.90 <sup>b</sup> | 6.10 <sup>a</sup> | n.d.              | n.d.              |
| phenylethanol                                  | 0.70 <sup>b</sup> | 1.25 <sup>a</sup> | n.d.              | n.d.              |
| 3,5,5-trimethyl-1-hexanol                      | n.d.              | n.d.              | 0.35 <sup>a</sup> | 0.25 <sup>a</sup> |
| (E)-2-octenal                                  | 0.55 <sup>b</sup> | 0.75 <sup>a</sup> | 0.25 <sup>c</sup> | 0.25 <sup>c</sup> |
| nonanal                                        | 0.90 <sup>d</sup> | 1.65 <sup>c</sup> | 2.65 <sup>a</sup> | 1.80 <sup>b</sup> |
| phenylethyl alcohol                            | n.d.              | n.d.              | 2.10 <sup>b</sup> | 4.10 <sup>a</sup> |
| ethyl caprylate                                | n.d.              | n.d.              | 0.35 <sup>b</sup> | 0.25 <sup>b</sup> |
| decanal                                        | n.d.              | n.d.              | 0.10 <sup>b</sup> | 0.10 <sup>b</sup> |
| (E,Z)-2,4-decadienal                           | 0.35 <sup>a</sup> | n.d.              | n.d.              | n.d.              |
| (E,E)-2,4-decadienal                           | 1.50 <sup>a</sup> | n.d.              | 0.90 <sup>b</sup> | 0.20 <sup>c</sup> |
| 1-methoxy-4-methylbicyclo(2,2,2)octane         | n.d.              | 0.25 <sup>a</sup> | n.d.              | n.d.              |
| dihydro-5-pentyl-2(3H)-furanone                | n.d.              | n.d.              | 0.20 <sup>a</sup> | 0.15 <sup>a</sup> |
| trans-9-decalol                                | 0.30 <sup>a</sup> | 0.35 <sup>a</sup> | n.d.              | n.d.              |
| 1H-indene,2,3-dihydro-1,1,3-trimethyl-3-phenyl | n.d.              | n.d.              | 0.11 <sup>b</sup> | 0.21 <sup>a</sup> |
| <b>Total</b>                                   | <b>98.22</b>      | <b>98.46</b>      | <b>98.48</b>      | <b>98.21</b>      |

n.b.= not determinated. In the same row, different letters indicate significant differences among samples.

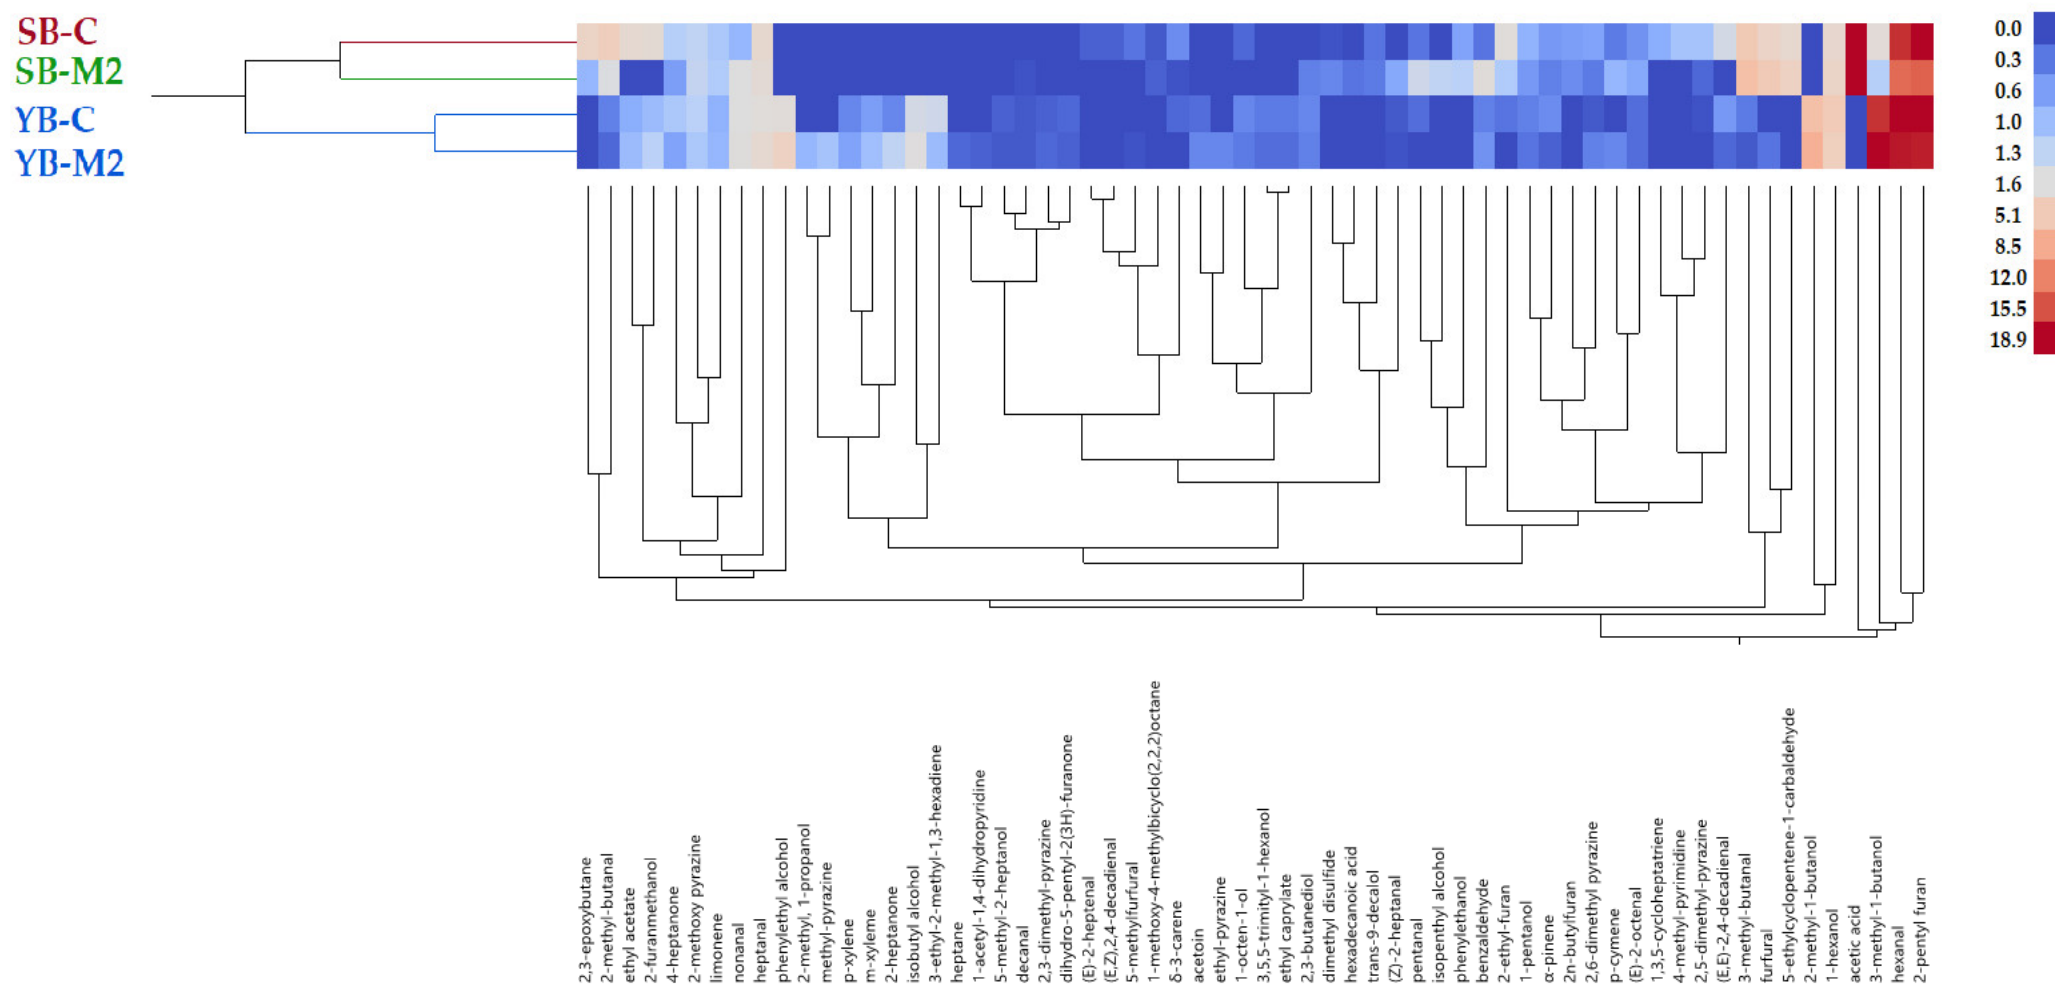

**Figure S1.** Hierarchical cluster analysis (HCA) based on VOCs of baked bread as a function of flour and leavening agent.
